# Supplementary material for: Characterization of a Toxoplasma effector uncovers an alternative GSK3/β-catenin-regulatory pathway of inflammation
Source: eLife journal article supplement (doi:10.7554/elife.39887), 2018-10-15
Supplement: supp [file elife_poa_e39887_Figure_5_figure_supplement_1_source_data_1.xlsx]

## Sheet: Feuil1
Name	ui - log₂ total RPKM	GT1 - log₂ total RPKM	RH - log₂ total RPKM	DEG - log₂ total RPKM	ME49 - log₂ total RPKM	PRU - log₂ total RPKM	CEP - log₂ total RPKM	ROD - log₂ total RPKM	VEG - log₂ total RPKM	CASTELLS - log₂ total RPKM	MAS - log₂ total RPKM	TgCATBr44 - log₂ total RPKM	GUY-KOE - log₂ total RPKM	GUY-MAT - log₂ total RPKM	RUB - log₂ total RPKM	BOF - log₂ total RPKM	FOU - log₂ total RPKM	GPHT - log₂ total RPKM	TgCATBr9 - log₂ total RPKM	CAST - log₂ total RPKM	TgCATBr5 - log₂ total RPKM	P89 - log₂ total RPKM	GUY-DOS - log₂ total RPKM	VAND - log₂ total RPKM	COUGAR - log₂ total RPKM	ARI - log₂ total RPKM	B41 - log₂ total RPKM	B73 - log₂ total RPKM	RAY - log₂ total RPKM	WTD3 - log₂ total RPKM
Ptprn	-2.36246	4.47741	1.79139	2.74475	2.65592	2.24391	1.25637	2.32704	4.2972	0.37132	5.1034	0.47583	6.35864	5.10108	5.59817	4.70628	2.04083	2.96889	3.50476	3.65057	6.16802	4.72329	5.97906	6.06597	2.06477	-1.97776	2.13472	2.21391	0.82476	1.24973
Serpine2	0.25976	6.11247	-0.01638	3.93999	2.08588	0.73951	1.30153	1.38137	2.2089	0.77381	4.25306	2.56071	6.57181	3.14819	2.96253	1.47728	2.65594	2.5044	2.49523	2.41144	3.74193	3.05563	5.7549	3.9207	2.59905	2.14962	3.84415	3.11655	0.49029	0.36908
Gpr35	0.43051	6.20101	5.34658	5.27283	6.50054	5.97684	4.88999	5.35186	5.60557	7.16225	6.53441	5.37353	5.59753	6.00079	5.55355	5.53761	5.46555	6.1642	6.01636	5.92338	6.79289	5.79631	6.36849	5.29219	6.28924	5.15802	6.15557	5.41084	5.23873	4.19256
Lad1	-5.9581	-0.64489	-6.04159	-0.08942	-0.993	-0.4624	-2.04757	0.67842	-0.31708	-2.95862	0.86528	-1.58073	0.32903	-0.31397	1.86519	-1.96884	-2.30915	-12.9015	-0.73839	-3.20851	1.35902	-0.10743	-0.18437	-3.45942	-2.3033	-5.25523	-2.3737	-0.10865	-2.35317	-5.1707
Rgs16	1.23817	2.676	-0.56522	2.19258	-0.24151	-0.77393	-1.65866	0.54579	2.02292	-12.9015	-1.16084	1.13011	0.81983	0.39687	2.42011	0.00503	2.07976	0.00708	1.12001	-0.01225	0.40398	0.45836	-0.38042	-0.48555	0.89297	-0.61839	0.01521	1.17335	1.29878	1.74178
Xcl1	-12.9015	1.26301	-12.9015	4.28976	0.57121	0.84615	-12.9015	-1.01072	-2.02234	-12.9015	-0.34812	-0.2271	2.49504	1.88766	1.0312	-0.50418	-12.9015	-1.1802	-12.9015	-0.42192	2.68618	1.89257	1.75422	3.22334	-12.9015	-2.46863	-1.17207	-0.71437	-12.9015	-1.96906
Ephx1	6.12071	8.01032	8.95426	7.98576	7.6427	7.52535	8.64997	8.00973	8.32482	8.60968	7.90646	8.3829	8.27699	8.44152	6.88678	8.35339	7.54443	7.72722	8.78085	8.84177	7.62062	8.16867	7.90057	8.21253	7.36077	7.96243	8.07625	8.07013	7.50888	7.56538
Cd34	0.45373	4.70188	1.8923	5.66921	6.49792	6.54587	2.08106	3.91796	3.44302	2.76518	3.31087	3.59422	4.53151	3.26412	4.46482	2.06922	1.15677	1.03829	2.77546	1.82743	3.16253	5.86227	2.67503	6.43295	2.85821	2.17453	5.15604	4.65095	4.64092	5.59035
Mertk	4.02323	5.07725	4.33411	3.99054	4.80392	4.32874	4.51132	4.69959	5.15807	4.14118	4.75475	4.8649	4.83977	4.09502	3.97125	4.06341	3.64979	3.89657	4.63842	3.73181	4.52732	4.22079	5.1261	4.30275	4.46241	5.57333	4.53505	4.32739	4.74998	4.18934
Il1b	1.00055	7.19052	4.57715	7.7941	10.3997	10.0597	3.17292	7.81214	8.10163	5.75098	6.06991	5.71015	6.34914	4.11329	8.34042	5.16721	4.33358	4.35553	6.16932	3.38206	5.6595	9.83871	5.33567	9.24416	9.73255	7.80261	7.7921	7.73878	9.75613	9.3245
Gm5150	2.56246	1.85331	0.8363	0.84872	0.81277	0.34409	1.47675	0.4255	0.97199	1.48885	1.72018	0.90599	0.72684	0.77701	0.52078	0.19861	3.3113	2.42945	1.16944	1.26015	0.96305	-0.16749	0.80314	0.02108	3.99638	2.12024	3.19427	2.51005	2.31107	1.79492
Csf1	2.62801	7.27905	6.66711	6.08139	6.46808	6.02586	6.26209	7.98056	6.83138	6.8791	8.1152	6.80118	8.12202	7.2487	7.84857	7.31885	5.00714	6.59443	8.07832	6.46061	7.61315	7.47397	7.47553	7.1966	5.98546	6.27712	6.18503	6.27493	5.71449	4.89992
F3	-1.79361	2.61507	1.34012	3.00468	3.54999	3.17956	0.53195	2.37616	1.0109	2.02689	2.7302	1.09189	3.04285	1.67154	3.0084	0.90933	-0.4666	0.54818	-0.01132	1.44139	1.91206	3.56029	1.65818	4.08357	1.47785	-1.60532	1.79078	2.48114	1.75242	2.44004
Tnfrsf9	-1.25704	8.04033	6.38693	9.27504	7.91516	7.33199	6.56595	7.95376	7.42657	7.55469	8.1455	7.15508	10.2831	9.01598	9.05924	7.89497	8.53599	6.92184	9.1833	8.46255	8.91145	9.78847	8.78948	10.9244	7.52003	4.55779	8.68385	6.89197	6.35062	6.09134
Ccl24	-2.81786	8.91652	8.72982	6.81332	5.64366	4.50095	10.0381	8.12346	9.82052	5.3582	9.23493	9.3062	10.1458	10.1726	10.5643	9.30325	9.60175	9.08258	10.1415	10.1817	9.37633	9.42138	10.2855	11.0566	6.24349	6.88782	8.07601	3.26863	5.49856	5.9179
Clec4n	4.11174	8.01183	7.57354	9.79322	8.68693	8.40206	8.57605	8.37417	9.39021	9.28052	7.63683	8.50318	7.06182	6.87446	8.55244	7.07991	8.44753	6.66698	8.30267	7.61943	6.95775	8.49615	6.78104	8.55173	9.42067	8.2177	9.44167	9.59053	10.2057	10.0226
BC035044	0.82807	5.27377	2.29598	7.86957	4.83519	6.19788	3.58105	3.96376	5.49211	2.19195	4.98329	5.90715	7.19429	5.76057	5.74416	5.56815	3.7065	1.71628	5.66926	3.90949	4.71854	5.79305	5.56257	7.30586	2.46619	0.92088	6.50868	3.75365	2.92551	4.42991
Olr1	-12.9015	6.90478	4.12891	6.74585	4.90137	5.64678	1.71415	7.1847	6.05683	2.70999	6.71863	5.24503	8.15489	5.91186	8.15647	6.56823	3.35946	4.49289	6.96468	4.74021	6.68605	7.97207	6.23215	8.18429	3.25098	1.80766	5.14291	4.78572	3.12162	2.90779
Il4i1	0.64551	6.6926	3.99175	8.19343	7.33275	8.31188	-12.9015	-12.9015	5.98926	-12.9015	-12.9015	-12.9015	-12.9015	-12.9015	-12.9015	7.01136	5.43648	4.15333	-12.9015	-12.9015	7.05036	-12.9015	6.56844	8.68771	7.55965	-12.9015	8.62858	6.41787	-12.9015	-12.9015
Snord34	0.21456	0.27984	-12.9015	1.10596	0.78734	0.42485	-12.9015	1.79038	0.36372	0.04411	-12.9015	-12.9015	-12.9015	-0.31124	-12.9015	-12.9015	-12.9015	-12.9015	-12.9015	-12.9015	-0.09768	-0.0433	-12.9015	-12.9015	0.69943	-0.08258	-12.9015	-0.32831	-0.08741	1.73892
Ccl22	-0.28021	11.3192	5.472	11.2335	11.2513	11.4806	6.08	10.9929	9.30497	6.58643	10.5035	9.19584	11.6832	10.6159	12.5839	9.93872	7.23774	6.50984	11.2217	8.38691	11.3801	12.2938	11.0242	11.8875	9.93768	7.24638	10.5819	9.64725	8.75173	8.51842
Cx3cl1	-0.11406	4.65938	2.39298	3.46742	6.18727	6.73117	0.91452	4.90701	3.42261	0.19611	4.47287	2.34659	4.58401	4.58761	6.34747	4.03088	2.15301	2.24539	5.32101	3.72495	4.99449	5.11096	4.43851	4.53577	3.25061	2.63014	3.75143	4.1091	2.26623	3.04797
Ccl17	-12.9015	9.12031	3.55302	0.44991	4.67561	4.9912	4.17358	8.8895	6.39418	-12.9015	7.23433	3.68349	8.51292	5.57187	11.0025	4.90766	3.42985	1.28678	8.25104	5.7156	7.13298	9.62821	6.9349	9.59232	4.66788	2.51772	1.29491	-0.24739	4.24144	2.98334
Scarna9	-0.71833	-0.65305	-12.9015	-12.9015	-12.9015	-12.9015	-12.9015	-12.9015	-12.9015	-12.9015	-12.9015	1.48911	-12.9015	0.34083	-12.9015	-12.9015	-12.9015	-12.9015	-12.9015	-12.9015	-12.9015	-12.9015	-12.9015	-12.9015	-12.9015	-12.9015	-12.9015	0.32377	-12.9015	-12.9015
Snord37	-12.9015	-12.9015	-12.9015	-12.9015	-12.9015	-12.9015	-12.9015	-12.9015	1.68019	-12.9015	-12.9015	-12.9015	-12.9015	-12.9015	-12.9015	-12.9015	-12.9015	-12.9015	-12.9015	-12.9015	-12.9015	-12.9015	-12.9015	-12.9015	-12.9015	-1.35106	-12.9015	-12.9015	-12.9015	-0.26653
Ramp3	-3.94094	4.50327	1.70297	7.07874	6.12213	5.88184	4.24953	3.70569	4.90832	3.93794	5.09527	5.67197	4.60357	5.63222	5.21567	3.92194	4.79531	2.9794	3.89069	4.10489	5.52733	5.68646	4.66328	6.79329	4.48857	1.13703	6.2088	5.08658	2.68613	2.62117
Myo1d	-0.69717	2.37797	2.00939	1.12426	1.42193	0.17064	0.93902	1.53936	0.79416	1.91671	2.05081	0.02696	2.39134	0.26068	-1.46017	0.10784	-0.40517	0.94533	1.42246	1.43562	0.51932	-0.63038	2.03474	-0.90445	0.50515	1.40103	-0.05614	1.6324	0.56321	0.6884
Ccl1	-12.9015	-12.9015	-12.9015	-12.9015	-2.29239	-2.59733	-12.9015	-12.9015	-12.9015	-12.9015	-12.9015	-12.9015	-12.9015	-1.39097	0.0156	-2.72526	-12.9015	-12.9015	-12.9015	-12.9015	-12.9015	-12.9015	-12.9015	-2.47887	-12.9015	-3.63437	-12.9015	-12.9015	-2.10958	-12.9015
Rad51d	3.64148	4.2543	4.22851	4.13265	4.5364	4.34819	3.90087	4.03313	3.84076	4.05391	4.13929	3.95598	3.95395	4.69929	3.80014	3.80269	4.56491	3.56127	3.78891	4.01905	2.51387	4.5526	3.8948	4.21778	3.58554	3.99614	4.27135	3.98453	3.4898	3.8255
Gngt2	7.81695	7.45548	6.57322	9.85712	7.13708	7.66639	6.74883	6.48247	7.60676	6.39663	6.66577	7.56272	7.5132	7.59255	7.67814	7.52491	7.46044	7.21549	7.01039	6.57351	7.25483	7.87556	7.30163	8.12138	7.34699	6.29014	8.29401	7.52736	6.47636	6.85828
Ccr7	-1.2291	7.53936	4.08333	9.82459	9.15696	8.90131	5.40504	7.31675	6.458	5.45319	7.96152	7.49528	8.74171	8.7341	9.53053	7.52876	5.94671	5.64034	7.52404	6.67023	9.0024	8.17454	7.85384	9.1974	7.76242	4.45706	9.45139	7.84758	5.04914	5.01428
Gpr68	0.52752	3.71007	4.04634	5.32115	5.69686	5.36858	2.98635	2.83214	4.39492	3.76263	4.56161	3.78919	4.2744	4.39404	4.3474	4.50978	2.4702	3.33942	3.45891	3.35633	4.70092	4.55148	4.44859	4.31676	3.96959	3.6877	5.44774	5.11527	3.85068	3.1809
Serpinb1a	4.1916	5.21563	5.56432	5.80289	4.96463	4.85359	5.99955	4.82461	4.84949	6.93228	4.92375	5.1413	3.21693	4.65247	3.01833	4.70613	6.47873	5.36222	5.52024	6.29942	4.54008	5.15916	3.89776	5.42865	3.71829	5.10773	5.15342	6.1014	5.92241	6.90183
F13a1	5.56324	5.64191	5.6512	7.72103	7.74887	6.88477	6.49823	5.31945	6.54449	7.35083	5.58209	7.40952	3.2083	6.65773	4.02577	5.45664	5.66739	6.38663	5.62881	5.3667	5.47707	5.82846	5.11326	2.68964	6.71968	6.86995	8.03054	8.66636	8.35158	8.23124
Edn1	-1.76895	2.18941	-0.33788	1.48502	1.28188	-0.61113	-0.44339	1.97679	2.24528	-12.9015	1.33453	1.15469	4.49793	3.1971	2.97689	1.44857	0.39457	-0.41508	2.33527	1.08016	1.34027	4.63954	2.83484	4.51233	-0.33655	-1.173	0.17801	-0.21229	0.61358	0.91153
Chkb	1.01876	0.37622	0.3503	0.10281	-1.56374	3.59597	4.29045	0.06733	-0.86182	3.71668	-0.45064	0.19645	3.33736	3.98117	0.03971	-0.02173	0.63796	-0.14521	4.16775	3.93862	0.48413	0.50374	0.12332	4.03563	0.44351	0.29014	4.16718	0.21874	0.10209	0.30693
Trem1	0.32389	4.16536	-0.57998	5.95353	4.95259	5.88411	-1.53653	1.40719	2.16334	1.53603	1.63404	2.76416	-0.51931	0.69668	2.50935	-1.09331	2.41904	0.13552	0.72948	0.37146	2.54676	1.74354	2.3142	2.43109	3.80624	1.80798	5.42915	3.38862	2.15273	2.78524
Syt7	-5.0216	2.9376	-1.30074	2.28503	2.56371	1.76716	-1.11108	0.57808	1.28015	-2.60709	3.20085	-0.61524	4.32454	2.51794	3.21895	1.0238	-3.37265	0.19077	2.13319	0.1017	4.23024	2.39548	3.70724	1.60346	0.43594	-1.06653	1.29814	1.31036	-0.04565	-0.94001
