# Supplementary material for: Characterization of a Toxoplasma effector uncovers an alternative GSK3/β-catenin-regulatory pathway of inflammation
Source: eLife journal article supplement (doi:10.7554/elife.39887), 2018-10-15
Supplement: supp [file elife_poa_e39887_Figure_5_figure_supplement_2_source_data_1.xlsx]

## Sheet: Feuil1
Name	ui - log₂ total RPKM	Pru - log₂ total RPKM	Pru asp5 - log₂ total RPKM
Ptprn	2.16848	4.60734	2.07311
Serpine2	2.74262	5.60821	5.53827
Gpr35	1.9208	5.40907	2.94521
Lad1	0.81772	4.99949	2.56476
Rgs16	0.36983	1.66881	2.10659
Xcl1	-2.40241	6.58076	-5.48316
Ephx1	2.59797	6.0168	3.26579
Cd34	-1.14231	5.00625	0.4476
Mertk	4.91234	4.65077	4.94549
Il1b	5.89758	10.8272	9.1754
Gm5150	6.37958	3.56983	6.86721
Csf1	2.98506	6.24848	4.47894
F3	-3.10052	1.57911	0.33364
Tnfrsf9	-0.63829	5.75233	0.43059
Ccl24	-2.96381	3.83153	4.03354
Clec4n	6.37432	10.0714	8.85756
BC035044	1.66388	6.85142	1.19411
Olr1	-1.81878	7.24061	1.97015
Il4i1	-0.45715	-5.20379	-2.76981
Snord34	2.54829	3.30088	3.34544
Ccl22	1.08709	12.1144	3.41473
Cx3cl1	1.01176	7.25393	2.12966
Ccl17	-1.96487	8.47785	0.53762
Scarna9	0.13573	-11.6024	-7.55464
Snord37	1.09261	2.14567	1.45947
Ramp3	-1.88415	4.62383	0.5102
Myo1d	2.70324	0.93255	2.44779
Ccl1	-11.6024	2.49241	-11.6024
Rad51d	2.02373	4.03249	3.17056
Gngt2	7.70944	6.83382	7.46779
Ccr7	1.06726	7.74524	2.20249
Gpr68	-0.07898	3.18072	1.63468
Serpinb1a	0.97214	-0.36293	0.35185
F13a1	2.19681	3.65459	2.34414
Edn1	0.80539	1.33714	1.50851
Chkb	1.05059	1.28709	2.81689
Trem1	0.87308	5.64463	3.64775
Syt7	-1.8041	4.08644	0.50369
