# Supplementary material for: Characterization of a Toxoplasma effector uncovers an alternative GSK3/β-catenin-regulatory pathway of inflammation
Source: eLife. 2018 Oct 15;7:e39887. doi: 10.7554/eLife.39887 (PMC6214654; doi:10.7554/eLife.39887)
Supplement: Supplementary file 1. [file elife-39887-supp1.xlsx]

## Sheet: Strains and Plasmids
Supplementary File 1. Strains and plasmids
Toxoplasma Strains		Genotype							Reference
RH ku80		RH Δku80							Bougdour et al., 2013
Pru ku80		Prugniaud Δku80 type II strain							Bougdour et al., 2013
76K GFP LUC		Type II 76K strain - GFP- and luciferase-expressing transgenes							kind gift from Michael Grigg (NIH)
RH GRA18-HA3		RH ku80 GRA18-HA3, endogenously tagged with the pLIC-GRA18-HA3 vector							This study
RH GRA18-HF		RH ku80 GRA18-HA-Flag, endogenously tagged with the pLIC-GRA18-HF vector							This study
Pru Δgra18		Pru ku80 Δgra18::DHFR							This study
Pru Δgra18 GRA18+++		Pru ku80 Δgra18::DHFR, PGRA1-GRA18-HA-Flag, pMiniHX							This study
76K Δgra18		76K Δgra18::DHFR							This study
RH Δmyr1		RH ku80 Δmyr::DHFR							This study
RH Δasp5		RH ku80 ASP5-Ty::DHFR							Curt-Varesano et al., 2016
Mammalian cell lines		Genotype
RAW 264.7		Mus musculus monocytes/macrophages							ATCC, TIB-71
L929		Mus musculus fibroblasts							Aziz et al., 2009
J774		Mus musculus monocytes/macrophages							ATCC, TIB-67
T-Rex		Homo sapiens, T-REx™-293/pcDNA6/TR© plasmid providing the Tet repressor, BlasticidinR							Invitrogen
T-Rex-mCherry		T-REx™-293/pcDNA-mCherry-HF							This study
T-Rex-GRA18FL		T-REx™-293/pcDNA-FH-GRA1826-648							This study
T-Rex-GRA18Nt		T-REx™-293/pcDNA-FH-GRA1826-440							This study
T-Rex-GRA18Ct		T-REx™-293/pcDNA-FH-GRA18233-648							This study
RAW 264.7 Ctnnb1-/-		RAW 264.7 Ctnnb1-/-							This study
Plasmids		Informations							Reference
pcDNA4		pcDNA4/TO/myc-His A, ZeocinR, AmpR							Invitrogen
pPuro		PuromycinR							Bougdour et al., 2013
pcDNA-FH-LIC		pcDNA4/Flag-HA-LIC, AmpR, ZeocinS							Bougdour et al., 2013
pcDNA-mCherry-HF		pcDNA4-LIC-HA-Flag/mCherry-HF							Bougdour et al., 2013
pcDNA-FH-GRA18FL		pcDNA-FH-LIC/Flag-HA-GRA1826-648							This study
pcDNA-FH-GRA18Nt		pcDNA-FH-LIC/pcDNA-FH-GRA1826-440							This study
pcDNA-FH-GRA18Ct		pcDNA-FH-LIC/pcDNA-FH-GRA18233-648							This study
pMiniHX		HXGPRT (HX), confers resistance to Mycophenolic acid and Xanthine							Bougdour et al., 2013
pDHFR-TSc3		Confers resistance to Pyrimethamine							Bougdour et al., 2013
pLIC-HF-DHFR		AmpR, PyrimethamineR, HA-Flag tag							Bougdour et al., 2013
pLIC-GRA18-HF		pLIC-HF-DHFR/GRA18-HA-Flag							This study
pPGRA1-GRA18II-HF		pLIC-HF-DHFR/PGRA1-GRA18II-HF							This study
pTOXO_Cas9-CRISPR		pUC57/pTgTUB8-TgU6-Cas9-HA-YFP							Curt-Varesano et al., 2016
pTOXO_Cas9-CRISPR::GRA18		pTOXO_Cas9-CRISPR/sgGRA18							This study
pDEST14		KnR							Invitrogen
pDONR221 P3-P2		AmpR							Invitrogen
pDONR221 P1-P4		AmpR							Invitrogen
pDONR221/DHFR		pDONR221 P4r-P3r/DHFR cassette, PyrimethamineR							Bougdour et al., 2013
pDONR221/5'GRA18		pDONR221 P1-P4/TGME49_288840 5' region							This study
pDONR221/3'GRA18		pDONR221 P3-P2/TGME49_288840 3'region							This study
pDEST14 KO GRA18		pDEST14/TGME49_288840 5'region-DHFR-TGME49_288840 3' region							This study
pX330-hSpCas9		pX330-U6-Chimeric_BB-CBh-hSpCas9, AmpR							Cong et al., 2013
pX330-hSpCas9::sgCTNNB1		pX330_hSpCas9/sgCTNNB1							This study
R: resistant
S: sensitive

## Sheet: Primers and oligonucleotides
Primers and oligonucleotides
Primer/oligo name				Primer/oligo sequence 5' to 3'						Comments
LICF-288840_F				TACTTCCAATCCAATTTAGCacttctctgtgtgacactccttg						Sequence in upper case corresponds to the LIC cloning cassette and the sequence in lower case is homologous to the GRA18 genomic DNA sequence.
LICR-288840_R				TCCTCCACTTCCAATTTTAGCcgtgtacgggtcggtccaaaaaccc						Sequence in upper case corresponds to the LIC cloning cassette and the sequence in lower case is homologous to the 3' region of GRA18 genomic DNA sequence.
LICF-PGRA1 _F2				TACTTCCAATCCAATTTAGCagctcgtgaccttacccggtgtg						Sequence in upper case corresponds to the LIC cloning cassette and the sequence in lower case is homologous to the 5' region of GRA1 genomic DNA sequence.
PGRA1 _R				catcttgcttgatttcttcaaagaacaac
GRA1-GRA181-x_F				gttgttctttgaagaaatcaagcaagatgGAAATCATGAACGACTGCCG						Sequence in lower case corresponds to the GRA1 promoter region and sequence in upper case corresponds to the GRA18 coding sequence. The ATG start codon is underlined.
pcDNA4-FlagHA-LIC-288840_F				GGTGCTGGTGCTGGTGCCCATctttctgttgatattcttccaacg						Sequence in upper case corresponds to the LIC cloning cassette and the sequence in lower case is homologous to the GRA18 genomic DNA sequence.
pcDNA4-FlagHA-LIC-288840_R				CTCCTTGTCGCCTTGCCCATCAattacccttagtgggtggtttaacg						Sequence in upper case corresponds to the LIC cloning cassette and the sequence in lower case is homologous to the GRA18 genomic DNA sequence.
pcDNA4-FlagHA-LIC-288840Ct_F				GGT GCT GGT GCT GGT GCC CAT TTA CAA AGT GGA CAA ACTA GAT ATG CT C
pcDNA4-FlagHA-LIC-288840Nt_R				CTC CTT GTC GCC TTG CCC A TCA CCTACGAAGACGCTCCTGTAACG
attB1-288840_F				GGGGACAAGTTTGTACAAAAAAGCAGGCTCTTGAGAATCTTTGATTTACCTTTGATG
attB4-288840_R				GGGGACAACTTTGTATAGAAAAGTTGGGTGATGAGCGAGAGGGGTCAACCATAAC
attB3-288840_F				GGGGACAACTTTGTATAATAAAGTTGATGCTTGTTGAGACTCCTCACGCG
attB2-288840_R				GGGGACCACTTTGTACAAGAAAGCTGGGTACCCTTCTGTGGAACAGTCTGAAGAG
dhfr-KO-ol1_R				GACAGAGTTGTCTCGACAACGAATG
dhfr-KO-ol1_F				CTTCATGTGGCATTTCACACAGTCTC
3'region-288840_R1				GCTCAAAACTAAGTACCTTGCTGC
5'region-288840_F2				TGACTACTTCTTCTGTCTGTTCGTC
GRA18-CRISP-FWD				AAGTTggggcgaatcgcggtgaatgG						gRNA sequence is shown in lower case while the flanked sequences in upper case correpsond to the homologous sequences to the digested vector backbone
GRA18-CRISP-REV				AAAACcattcaccgcgattcgccccA						gRNA sequence is shown in lower case while the flanked sequences in upper case correpsond to the homologous sequences to the digested vector backbone
GRA18-DHFR - F				aacaaccggcacgaattgccaccgcctggtcagaggtaccccgggggcgaatcgcggtgaaagcttcgccaggctgtaaatc
GRA18-DHFR - R				ctggcttcggcgatcctcgaattatgaatgtgctctgttgtcccacaacaccgctccgcatggaattcatcctgcaagtgcatag
Chk ctnnb1_F				TCACGCAAGAGCAAGTAGCTGG
Chk ctnnb1_R				TGAAGAGGCACCATTAGTTTCC
