# Supplementary material for: Characterization of a Toxoplasma effector uncovers an alternative GSK3/β-catenin-regulatory pathway of inflammation
Source: eLife. 2018 Oct 15;7:e39887. doi: 10.7554/eLife.39887 (PMC6214654; doi:10.7554/eLife.39887)
Supplement: Supplementary file 2. [file elife-39887-supp2.xlsx]

## Sheet: Y2H screen results
Supplementary File 2. Y2H screen results
Gene Name	Global PBS	Additional Gene Notes
Homo sapiens - BAP1	D	BAP1; [gi|507116140|ref|NM_004656.3| Homo sapiens BRCA1 associated protein-1 (ubiquitin carboxy-terminal hydrolase) (BAP1), mRNA]
Homo sapiens - BAT3	A	BAT3; [gi|149158695|ref|NM_001098534.1| Homo sapiens HLA-B associated transcript 3 (BAT3), transcript variant 4, mRNA]
Homo sapiens - BAT3	A	BAT3; [gi|149158695|ref|NM_001098534.1| Homo sapiens HLA-B associated transcript 3 (BAT3), transcript variant 4, mRNA]
Homo sapiens - BAT3	A	BAT3; [gi|149158695|ref|NM_001098534.1| Homo sapiens HLA-B associated transcript 3 (BAT3), transcript variant 4, mRNA]
Homo sapiens - BAT3	A	BAT3; [gi|149158695|ref|NM_001098534.1| Homo sapiens HLA-B associated transcript 3 (BAT3), transcript variant 4, mRNA]
Homo sapiens - BAT3	A	BAT3; [gi|149158695|ref|NM_001098534.1| Homo sapiens HLA-B associated transcript 3 (BAT3), transcript variant 4, mRNA]
Homo sapiens - BAT3	A	BAT3; [gi|149158695|ref|NM_001098534.1| Homo sapiens HLA-B associated transcript 3 (BAT3), transcript variant 4, mRNA]
Homo sapiens - BTBD2	B	BTBD2; [gi|59814163|ref|NM_017797.3| Homo sapiens BTB (POZ) domain containing 2 (BTBD2), mRNA]
Homo sapiens - BTBD2	B	BTBD2; [gi|59814163|ref|NM_017797.3| Homo sapiens BTB (POZ) domain containing 2 (BTBD2), mRNA]
Homo sapiens - CTNNB1 var3	B	CTNNB1 var3; [gi|148227671|ref|NM_001098210.1| Homo sapiens catenin (cadherin-associated protein), beta 1, 88kDa (CTNNB1), mRNA]
Homo sapiens - CTNNB1 var3	B	CTNNB1 var3; [gi|148227671|ref|NM_001098210.1| Homo sapiens catenin (cadherin-associated protein), beta 1, 88kDa (CTNNB1), mRNA]
Homo sapiens - CTNNB1 var3	B	CTNNB1 var3; [gi|148227671|ref|NM_001098210.1| Homo sapiens catenin (cadherin-associated protein), beta 1, 88kDa (CTNNB1), mRNA]
Homo sapiens - GSK3A	A	GSK3A; [gi|49574531|ref|NM_019884.2| Homo sapiens glycogen synthase kinase 3 alpha (GSK3A), mRNA]
Homo sapiens - GSK3A	A	GSK3A; [gi|49574531|ref|NM_019884.2| Homo sapiens glycogen synthase kinase 3 alpha (GSK3A), mRNA]
Homo sapiens - GSK3A	A	GSK3A; [gi|49574531|ref|NM_019884.2| Homo sapiens glycogen synthase kinase 3 alpha (GSK3A), mRNA]
Homo sapiens - GSK3A	A	GSK3A; [gi|49574531|ref|NM_019884.2| Homo sapiens glycogen synthase kinase 3 alpha (GSK3A), mRNA]
Homo sapiens - GSK3A	A	GSK3A; [gi|49574531|ref|NM_019884.2| Homo sapiens glycogen synthase kinase 3 alpha (GSK3A), mRNA]
Homo sapiens - GSK3A	A	GSK3A; [gi|49574531|ref|NM_019884.2| Homo sapiens glycogen synthase kinase 3 alpha (GSK3A), mRNA]
Homo sapiens - GSK3A	A	GSK3A; [gi|49574531|ref|NM_019884.2| Homo sapiens glycogen synthase kinase 3 alpha (GSK3A), mRNA]
Homo sapiens - GSK3A	A	GSK3A; [gi|49574531|ref|NM_019884.2| Homo sapiens glycogen synthase kinase 3 alpha (GSK3A), mRNA]
Homo sapiens - GSK3A	A	GSK3A; [gi|49574531|ref|NM_019884.2| Homo sapiens glycogen synthase kinase 3 alpha (GSK3A), mRNA]
Homo sapiens - GSK3A	A	GSK3A; [gi|49574531|ref|NM_019884.2| Homo sapiens glycogen synthase kinase 3 alpha (GSK3A), mRNA]
Homo sapiens - GSK3A	A	GSK3A; [gi|49574531|ref|NM_019884.2| Homo sapiens glycogen synthase kinase 3 alpha (GSK3A), mRNA]
Homo sapiens - GSK3B	B	GSK3B; [gi|225903436|ref|NM_001146156.1| Homo sapiens glycogen synthase kinase 3 beta (GSK3B), transcript variant 2, mRNA]
Homo sapiens - GSK3B	B	GSK3B; [gi|225903436|ref|NM_001146156.1| Homo sapiens glycogen synthase kinase 3 beta (GSK3B), transcript variant 2, mRNA]
Homo sapiens - GSK3B	B	GSK3B; [gi|225903436|ref|NM_001146156.1| Homo sapiens glycogen synthase kinase 3 beta (GSK3B), transcript variant 2, mRNA]
Homo sapiens - PELP1	C	PELP1; [gi|155030231|ref|NM_014389.2| Homo sapiens proline, glutamate and leucine rich protein 1 (PELP1), mRNA]
Homo sapiens - PELP1	C	PELP1; [gi|155030231|ref|NM_014389.2| Homo sapiens proline, glutamate and leucine rich protein 1 (PELP1), mRNA]
Homo sapiens - PPP2R5A	A	PPP2R5A; [gi|315113858|ref|NM_006243.3| Homo sapiens protein phosphatase 2, regulatory subunit B', alpha (PPP2R5A), transcript variant 1, mRNA]
Homo sapiens - PPP2R5A	A	PPP2R5A; [gi|315113858|ref|NM_006243.3| Homo sapiens protein phosphatase 2, regulatory subunit B', alpha (PPP2R5A), transcript variant 1, mRNA]
Homo sapiens - PPP2R5A	A	PPP2R5A; [gi|315113858|ref|NM_006243.3| Homo sapiens protein phosphatase 2, regulatory subunit B', alpha (PPP2R5A), transcript variant 1, mRNA]
Homo sapiens - PPP2R5A	A	PPP2R5A; [gi|315113858|ref|NM_006243.3| Homo sapiens protein phosphatase 2, regulatory subunit B', alpha (PPP2R5A), transcript variant 1, mRNA]
Homo sapiens - PPP2R5A	A	PPP2R5A; [gi|315113858|ref|NM_006243.3| Homo sapiens protein phosphatase 2, regulatory subunit B', alpha (PPP2R5A), transcript variant 1, mRNA]
Homo sapiens - PPP2R5A	A	PPP2R5A; [gi|315113858|ref|NM_006243.3| Homo sapiens protein phosphatase 2, regulatory subunit B', alpha (PPP2R5A), transcript variant 1, mRNA]
Homo sapiens - PPP2R5A	A	PPP2R5A; [gi|315113858|ref|NM_006243.3| Homo sapiens protein phosphatase 2, regulatory subunit B', alpha (PPP2R5A), transcript variant 1, mRNA]
Homo sapiens - PPP2R5A	A	PPP2R5A; [gi|315113858|ref|NM_006243.3| Homo sapiens protein phosphatase 2, regulatory subunit B', alpha (PPP2R5A), transcript variant 1, mRNA]
Homo sapiens - PPP2R5A	A	PPP2R5A; [gi|315113858|ref|NM_006243.3| Homo sapiens protein phosphatase 2, regulatory subunit B', alpha (PPP2R5A), transcript variant 1, mRNA]
Homo sapiens - PPP2R5B	A	PPP2R5B; [gi|295148153|ref|NM_006244.3| Homo sapiens protein phosphatase 2, regulatory subunit B', beta (PPP2R5B), mRNA]
Homo sapiens - PPP2R5B	A	PPP2R5B; [gi|295148153|ref|NM_006244.3| Homo sapiens protein phosphatase 2, regulatory subunit B', beta (PPP2R5B), mRNA]
Homo sapiens - PPP2R5B	A	PPP2R5B; [gi|295148153|ref|NM_006244.3| Homo sapiens protein phosphatase 2, regulatory subunit B', beta (PPP2R5B), mRNA]
Homo sapiens - PPP2R5B	A	PPP2R5B; [gi|295148153|ref|NM_006244.3| Homo sapiens protein phosphatase 2, regulatory subunit B', beta (PPP2R5B), mRNA]
Homo sapiens - PPP2R5B	A	PPP2R5B; [gi|295148153|ref|NM_006244.3| Homo sapiens protein phosphatase 2, regulatory subunit B', beta (PPP2R5B), mRNA]
Homo sapiens - PPP2R5C	D	PPP2R5C; [gi|240849335|ref|NM_002719.3| Homo sapiens protein phosphatase 2, regulatory subunit B', gamma (PPP2R5C), transcript variant 1, mRNA]
Homo sapiens - PPP2R5D	A	PPP2R5D; [gi|394582123|ref|NM_006245.3| Homo sapiens protein phosphatase 2, regulatory subunit B', delta (PPP2R5D), transcript variant 1, mRNA]
Homo sapiens - PPP2R5D	A	PPP2R5D; [gi|394582123|ref|NM_006245.3| Homo sapiens protein phosphatase 2, regulatory subunit B', delta (PPP2R5D), transcript variant 1, mRNA]
Homo sapiens - PPP2R5D	A	PPP2R5D; [gi|394582123|ref|NM_006245.3| Homo sapiens protein phosphatase 2, regulatory subunit B', delta (PPP2R5D), transcript variant 1, mRNA]
Homo sapiens - PPP2R5D	A	PPP2R5D; [gi|394582123|ref|NM_006245.3| Homo sapiens protein phosphatase 2, regulatory subunit B', delta (PPP2R5D), transcript variant 1, mRNA]
Homo sapiens - PPP2R5D	A	PPP2R5D; [gi|394582123|ref|NM_006245.3| Homo sapiens protein phosphatase 2, regulatory subunit B', delta (PPP2R5D), transcript variant 1, mRNA]
Homo sapiens - PPP2R5D	A	PPP2R5D; [gi|394582123|ref|NM_006245.3| Homo sapiens protein phosphatase 2, regulatory subunit B', delta (PPP2R5D), transcript variant 1, mRNA]
Homo sapiens - PPP2R5D	A	PPP2R5D; [gi|394582123|ref|NM_006245.3| Homo sapiens protein phosphatase 2, regulatory subunit B', delta (PPP2R5D), transcript variant 1, mRNA]
Homo sapiens - PPP2R5D	A	PPP2R5D; [gi|394582123|ref|NM_006245.3| Homo sapiens protein phosphatase 2, regulatory subunit B', delta (PPP2R5D), transcript variant 1, mRNA]
Homo sapiens - PPP2R5D	A	PPP2R5D; [gi|394582123|ref|NM_006245.3| Homo sapiens protein phosphatase 2, regulatory subunit B', delta (PPP2R5D), transcript variant 1, mRNA]
Homo sapiens - PPP2R5D	A	PPP2R5D; [gi|394582123|ref|NM_006245.3| Homo sapiens protein phosphatase 2, regulatory subunit B', delta (PPP2R5D), transcript variant 1, mRNA]
Homo sapiens - PPP2R5D	A	PPP2R5D; [gi|394582123|ref|NM_006245.3| Homo sapiens protein phosphatase 2, regulatory subunit B', delta (PPP2R5D), transcript variant 1, mRNA]
Homo sapiens - PPP2R5D	A	PPP2R5D; [gi|394582123|ref|NM_006245.3| Homo sapiens protein phosphatase 2, regulatory subunit B', delta (PPP2R5D), transcript variant 1, mRNA]
Homo sapiens - PPP2R5D	A	PPP2R5D; [gi|394582123|ref|NM_006245.3| Homo sapiens protein phosphatase 2, regulatory subunit B', delta (PPP2R5D), transcript variant 1, mRNA]
Homo sapiens - PPP2R5D	A	PPP2R5D; [gi|394582123|ref|NM_006245.3| Homo sapiens protein phosphatase 2, regulatory subunit B', delta (PPP2R5D), transcript variant 1, mRNA]
Homo sapiens - PPP2R5D	A	PPP2R5D; [gi|394582123|ref|NM_006245.3| Homo sapiens protein phosphatase 2, regulatory subunit B', delta (PPP2R5D), transcript variant 1, mRNA]
Homo sapiens - PPP2R5D	A	PPP2R5D; [gi|394582123|ref|NM_006245.3| Homo sapiens protein phosphatase 2, regulatory subunit B', delta (PPP2R5D), transcript variant 1, mRNA]
Homo sapiens - PPP2R5D	A	PPP2R5D; [gi|394582123|ref|NM_006245.3| Homo sapiens protein phosphatase 2, regulatory subunit B', delta (PPP2R5D), transcript variant 1, mRNA]
Homo sapiens - PTPRG	D	PTPRG; [gi|194097397|ref|NM_002841.3| Homo sapiens protein tyrosine phosphatase, receptor type, G (PTPRG), mRNA]
Homo sapiens - UBQLN1 variant 1	B	UBQLN1 variant 1; [gi|194328681|ref|NM_013438.4| Homo sapiens ubiquilin 1 (UBQLN1), transcript variant 1, mRNA]
Homo sapiens - UBQLN1 variant 1	B	UBQLN1 variant 1; [gi|194328681|ref|NM_013438.4| Homo sapiens ubiquilin 1 (UBQLN1), transcript variant 1, mRNA]
Homo sapiens - ZNF131	C	ZNF131; [gi|84872172|ref|NM_003432.1| Homo sapiens zinc finger protein 131 (ZNF131), mRNA]
Homo sapiens - ZNF131	C	ZNF131; [gi|84872172|ref|NM_003432.1| Homo sapiens zinc finger protein 131 (ZNF131), mRNA]
Summary of PBS categories
A : Very high confidence in the interaction
B : High confidence in the interaction
C : Good confidence in the interaction
D : Moderate confidence in the interaction
This category is the most difficult to interpret because it mixes two classes of interactions :
* False-positive interactions
* Interactions hardly detectable by the Y2H technique (low representation of the mRNA in the library, prey folding, prey toxicity in yeast...)
