# Supplementary figures and images for: Characterization of a Toxoplasma effector uncovers an alternative GSK3/β-catenin-regulatory pathway of inflammation
Source: eLife journal article supplement (doi:10.7554/elife.39887), 2018-10-15

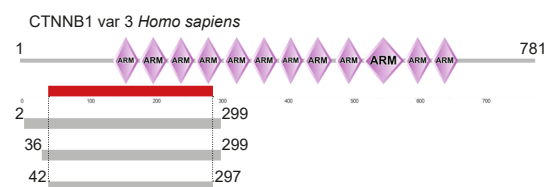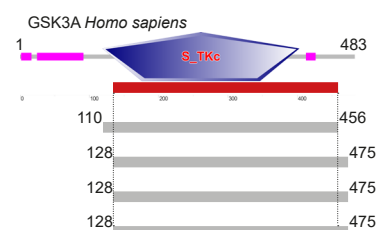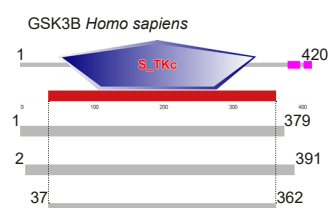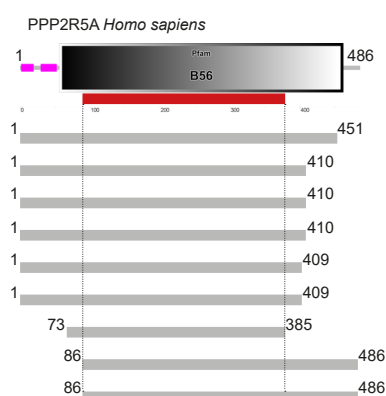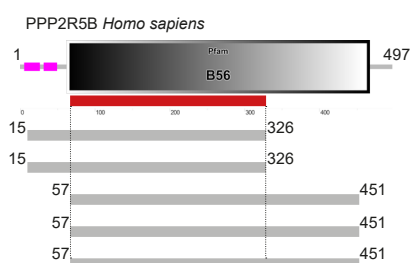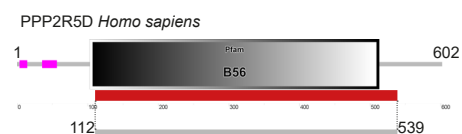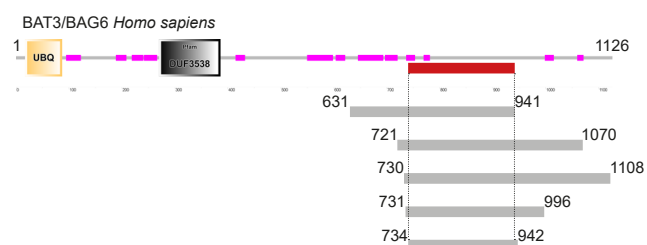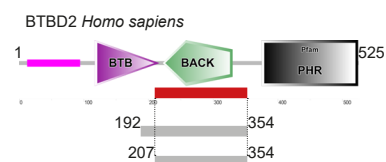

Figure 2 - figure supplement 1

Supplement: supp [file elife_poa_e39887_Figure_2_figure_supplement_1.pdf › elife_poa_e39887_Figure_2_figure_supplement_1.pdf]

A

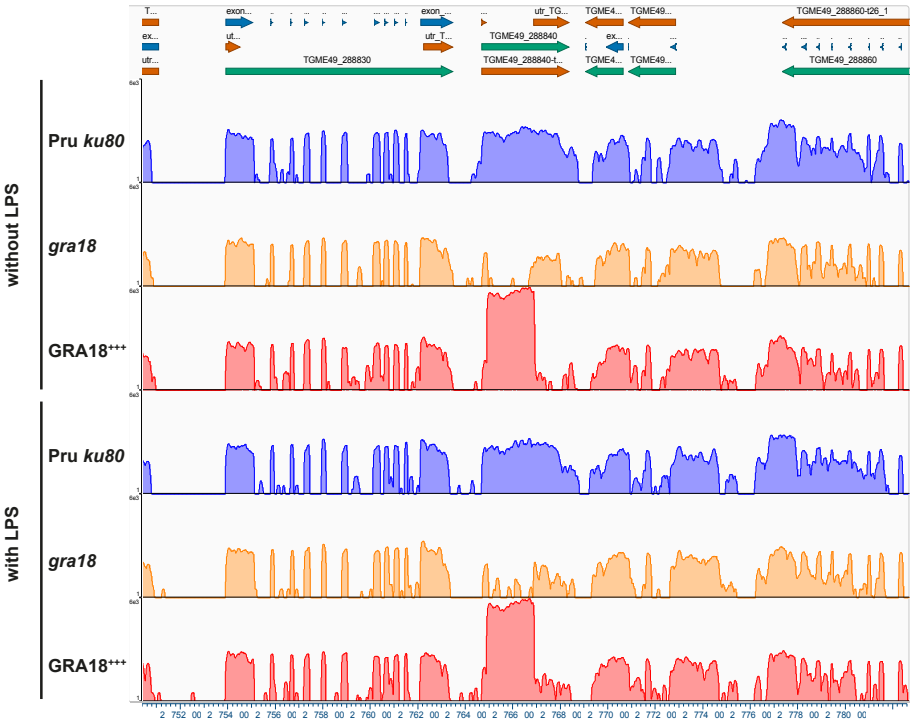

B

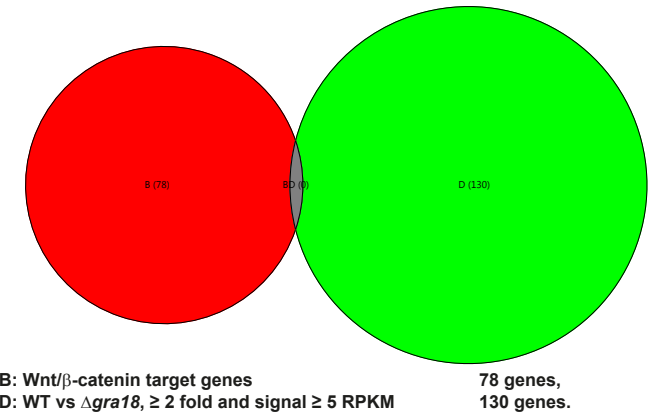

C

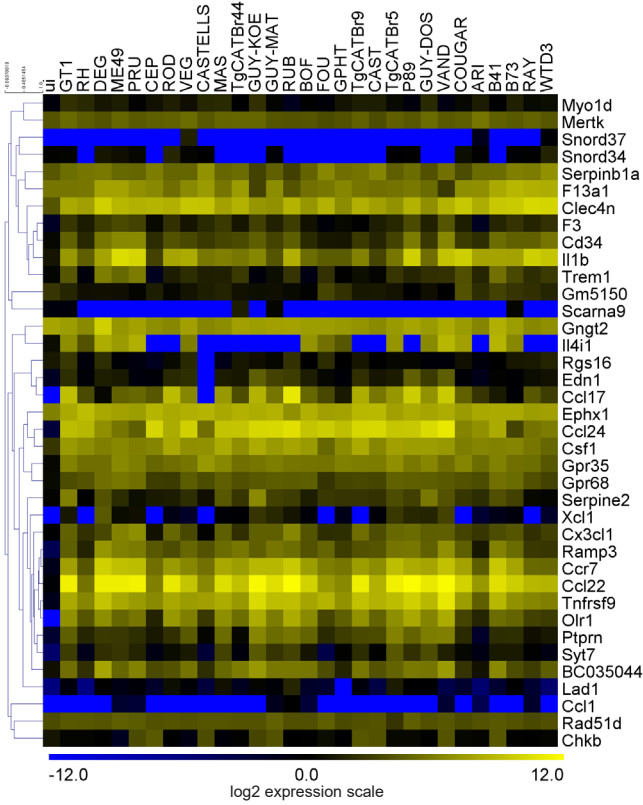

Figure 5-figure supplement 1

Supplement: supp [file elife_poa_e39887_Figure_5_figure_supplement_1.pdf › elife_poa_e39887_Figure_5_figure_supplement_1.pdf]

**A**

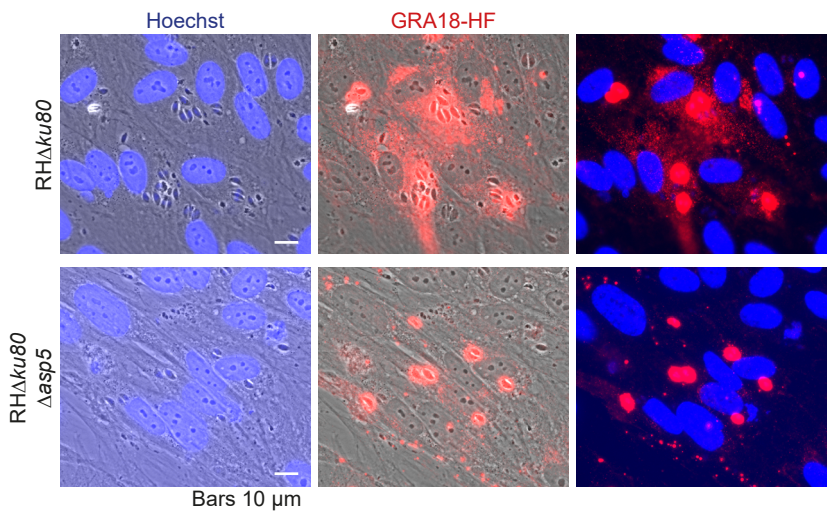

**B**

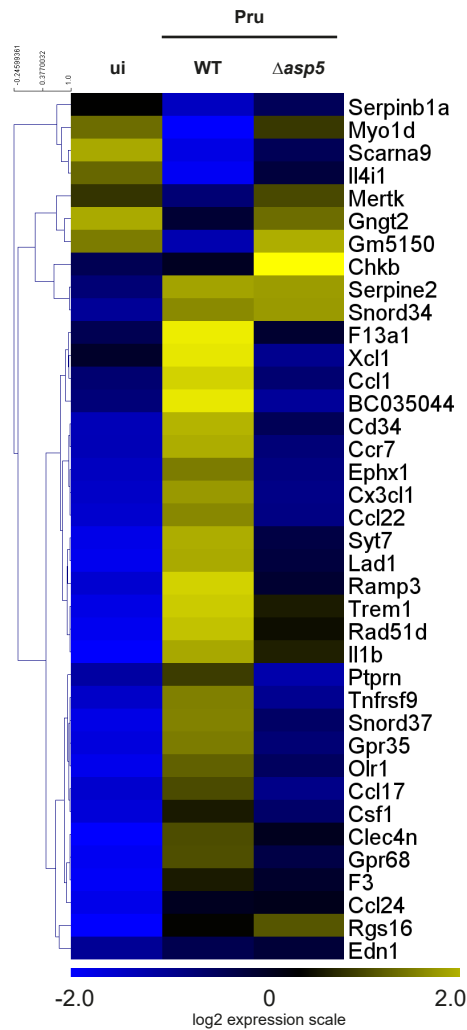

Figure 5-figure supplement 2

Supplement: supp [file elife_poa_e39887_Figure_5_figure_supplement_2.pdf › elife_poa_e39887_Figure_5_figure_supplement_2.pdf]
